# Supplementary material
Source: PubMed Central journal article supplement (PMC1567909)

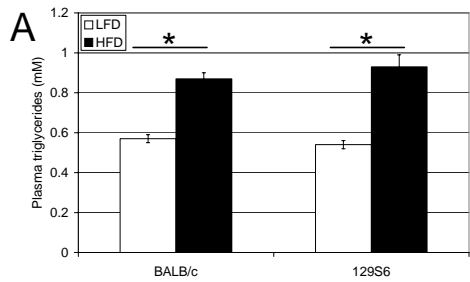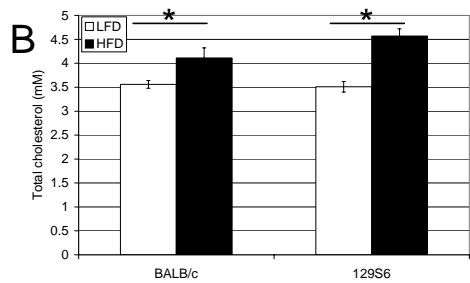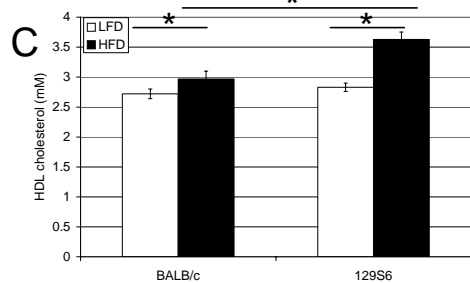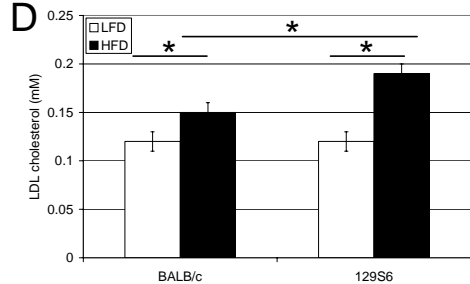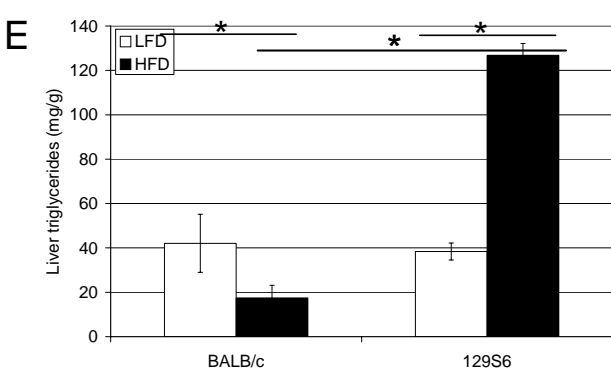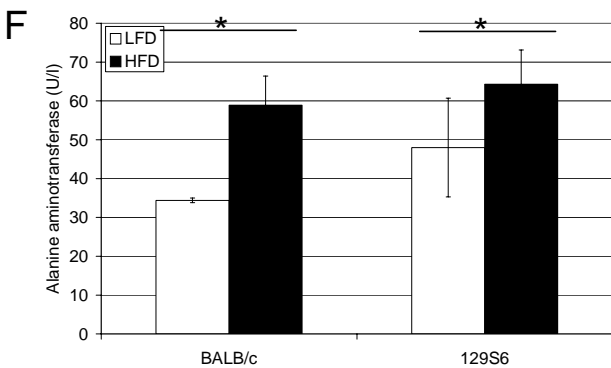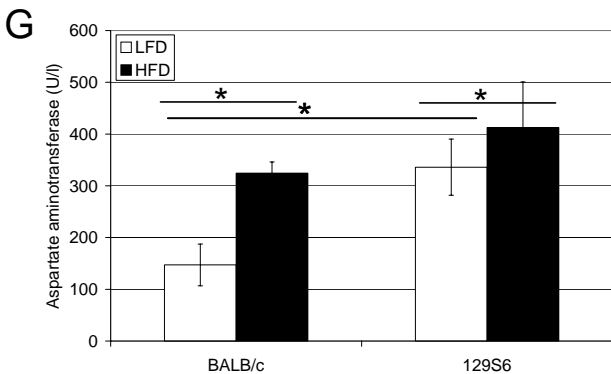

Supplement: pnas_0601056103_1.pdf [file pnas_0601056103_1.pdf]

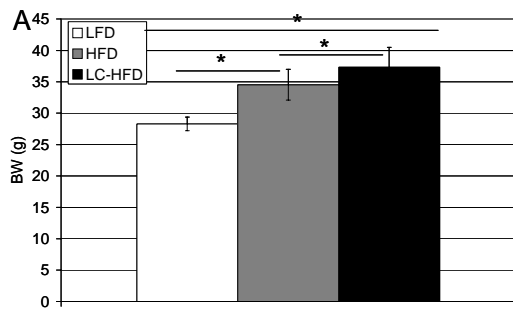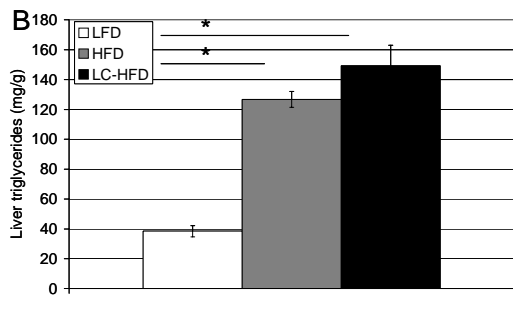

Supplement: pnas_0601056103_6.pdf [file pnas_0601056103_6.pdf]
